# Supplementary material for: Overexpression of BDNF Increases Excitability of the Lumbar Spinal Network and Leads to Robust Early Locomotor Recovery in Completely Spinalized Rats
Source: PubMed Central journal article supplement (PMC3925164; doi:10.1371/journal.pone.0088833), 2014-02-14

**AA - GABA [umol/g wet tissue]**

| Rat number | Rat     |                  |         |         |
|------------|---------|------------------|---------|---------|
|            | Th 6-8  | Th 9-10 (lesion) | L1-2    | L3-6    |
| Control 1  | 0,55996 | 0,55996          | 0,64896 | 0,80005 |
| Control 2  | 0,46118 | 0,46118          | 0,64343 | 0,73052 |
| Control 3  | 0,62951 | 0,62951          |         | 0,69266 |
| Control 4  | 0,48802 | 0,48802          | 0,65913 | 0,72396 |
| Spinal 1   | 0,61786 | 0,25709          | 0,47737 | 0,88966 |
| Spinal 2   | 0,54459 | 0,46636          | 0,54122 | 0,89825 |
| Spinal 3   | 0,59783 | 0,40293          | 0,45147 | 0,69637 |
| Spinal 4   | 0,43924 | 0,31548          | 0,50520 | 0,69534 |

**AA - Glycin [umol/g wet tissue]**

| Rat number | Rat     |                  |         |         |
|------------|---------|------------------|---------|---------|
|            | Th 6-8  | Th 9-10 (lesion) | L1-2    | L3-6    |
| Control 1  | 1,98962 | 1,98962          | 2,17749 | 2,59370 |
| Control 2  | 1,83503 | 1,83503          | 1,90143 | 2,68863 |
| Control 3  | 2,19716 | 2,19716          |         | 2,30644 |
| Control 4  | 1,81867 | 1,81867          | 2,15510 | 2,44951 |
| Spinal 1   | 1,92006 | 0,97632          | 1,61825 | 2,74686 |
| Spinal 2   | 1,73465 | 1,12777          | 1,27126 | 2,45054 |
| Spinal 3   | 1,98142 | 1,53347          | 1,54125 | 2,42790 |
| Spinal 4   | 1,43610 | 1,03252          | 1,69440 | 2,26176 |

**AA - Glutamic acid [umol/g wet tissue]**

| Rat number | Rat     |                  |         |         |
|------------|---------|------------------|---------|---------|
|            | Th 6-8  | Th 9-10 (lesion) | L1-2    | L3-6    |
| Control 1  | 2,03058 | 2,03058          | 2,12076 | 2,49303 |
| Control 2  | 1,79055 | 1,79055          | 2,13196 | 2,88896 |
| Control 3  | 2,20015 | 2,20015          |         | 2,30855 |
| Control 4  | 2,03163 | 2,03163          | 2,44122 | 2,62825 |
| Spinal 1   | 2,19212 | 1,22380          | 1,61490 | 2,88664 |
| Spinal 2   | 1,81540 | 1,61919          | 1,79557 | 2,74925 |
| Spinal 3   | 2,19454 | 2,05229          | 2,14898 | 2,56468 |
| Spinal 4   | 1,69412 | 1,52390          | 1,93840 | 2,52134 |

**AA - Aspartate [umol/g wet tissue]**

| Rat number | Rat     |                  |         |         |
|------------|---------|------------------|---------|---------|
|            | Th 6-8  | Th 9-10 (lesion) | L1-2    | L3-6    |
| Control 1  | 0,97387 | 0,97387          | 1,03179 | 1,31970 |
| Control 2  | 0,78695 | 0,78695          | 0,90984 | 1,22159 |
| Control 3  | 0,99919 | 0,99919          |         | 1,20362 |
| Control 4  | 0,82446 | 0,82446          | 1,20081 | 1,30727 |
| Spinal 1   | 0,91769 | 0,41911          | 0,80295 | 1,56775 |
| Spinal 2   | 0,79724 | 0,55194          | 0,72830 | 1,39896 |
| Spinal 3   | 1,03586 | 0,79436          | 0,96630 | 1,46694 |
| Spinal 4   | 0,80861 | 0,58443          | 0,83529 | 1,26147 |

Intact control  
Spinal

GABA [ $\mu\text{mol}/100\text{mg protein}$ ]

| Rat number | Th rost lesion | Th 11-12 (lesion) | Th caud lesion | L1-2 (injection) | L3-6    |
|------------|----------------|-------------------|----------------|------------------|---------|
| 7.1        | 2,04215        | 2,04215           | 2,04215        | 1,92074          | 3,01310 |
| 7.2        | 2,17031        | 2,17031           | 2,17031        | 2,46081          | 2,06290 |
| 7.3        | 1,96020        | 1,96020           | 1,96020        | 2,17879          | 1,74621 |
| 7.4        | 1,85779        | 1,85779           | 1,85779        | 2,10936          | 2,59679 |
| 7.5        | 3,08792        | 3,08792           | 3,08792        | 3,20642          | 3,30886 |
| 5.1        | 0,83246        | 0,18554           | 0,75297        | 0,85715          | 1,36801 |
| 5.2        | 1,16628        | 0,93624           | 1,10339        | 1,36792          | 2,54127 |
| 5.4        | 1,82951        | 0,78454           | 1,61855        | 1,99339          | 2,50181 |
| 4.6        | 0,96575        | 0,71581           | 2,21004        | 2,20886          | 4,39760 |
| 4.8        | 1,51804        | 1,66535           | 1,88369        | 2,01586          | 4,85842 |
| 4.10       | 1,59547        | 0,65423           | 2,07206        | 3,13199          | 4,27524 |
| 4.11       | 2,08804        | 1,62570           | 3,09959        | 3,19556          | 3,71653 |

Intact control

SP-PBS

SP-BDNF

**BDNF [ng/100mg protein]**

| <b>Rat number</b> | Th rost lesion | Th 11-12 (lesion) | Th caud lesion | L1-2 (injection) | L3-6     |
|-------------------|----------------|-------------------|----------------|------------------|----------|
| 7.1               | 194,68         | 194,68            | 194,68         | 149,52           | 108,40   |
| 7.2               | 292,64         | 292,64            | 292,64         | 192,29           | 200,51   |
| 7.3               | 217,93         | 217,93            | 217,93         | 129,25           | 120,87   |
| 7.4               | 229,84         | 229,84            | 229,84         | 142,54           | 182,16   |
| 7.5               | 235,04         | 235,04            | 235,04         | 181,27           | 160,40   |
| 5.1               | 70,27          | 47,47             | 85,20          | 121,20           | 113,20   |
| 5.2               | 104,31         | 195,19            | 78,56          | 89,63            | 168,45   |
| 5.4               | 104,23         | 96,18             | 88,00          | 93,41            | 139,51   |
| 4.6               | 66,88          | 9026,40           | 14898,17       | 18441,15         | 13645,41 |
| 4.8               | 94,91          | 5818,67           | 48554,58       | 43970,32         | 29668,18 |
| 4.10              | 146,56         | 11538,08          | 18116,95       | 40340,52         | 17919,49 |
| 4.11              | 56,42          | 13904,69          | 16617,19       | 34773,92         | 12230,24 |

- Intact control
- SP-PBS
- SP-BDNF

## BDNF/GAPDH mRNA

| Rat number | Th 11-12<br>(lesion) | L1-2<br>(injection) | L3-6   |
|------------|----------------------|---------------------|--------|
| 7.1        | 0,0082               | 0,0096              | 0,0085 |
| 7.2        | 0,0060               | 0,0080              | 0,0065 |
| 7.3        | 0,0055               | 0,0098              | 0,0087 |
| 7.4        | 0,0066               | 0,0064              | 0,0064 |
| 7.5        | 0,0069               | 0,0060              | 0,0092 |
| 5.1        | 0,0006               | 0,0033              | 0,0049 |
| 5.2        | 0,0015               | 0,0021              | 0,0069 |
| 5.4        | 0,0024               | 0,0018              | 0,0030 |
| 4.6        | 0,0377               | 8,9785              | 0,3912 |
| 4.8        | 0,0172               | 7,8970              | 0,4999 |
| 4.10       | 0,0159               | 3,8370              | 0,4587 |
| 4.11       | 0,0204               | 3,5555              | 0,1541 |

Intact control

SP-PBS

SP-BDNF

## GAD67/GAPDH mRNA

| Rat number | Th 11-12<br>(lesion) | L1-2<br>(injection) | L3-6   |
|------------|----------------------|---------------------|--------|
| 7.1        | 0,1381               | 0,1157              | 0,0935 |
| 7.2        | 0,1103               | 0,1488              | 0,1106 |
| 7.3        | 0,1022               |                     | 0,1054 |
| 7.4        | 0,1198               | 0,1053              | 0,1098 |
| 7.5        | 0,1283               | 0,0814              | 0,1254 |
| 5.1        | 0,0017               | 0,0785              | 0,1330 |
| 5.2        | 0,0092               | 0,0558              | 0,0821 |
| 5.4        | 0,0034               | 0,0479              | 0,0824 |
| 4.6        | 0,1073               | 0,2236              | 0,2513 |
| 4.8        | 0,0563               | 0,1541              | 0,2563 |
| 4.10       | 0,0053               | 0,1739              | 0,2059 |
| 4.11       | 0,0669               | 0,1741              | 0,1472 |

Intact control

SP-PBS

SP-BDNF

**GAD65/GAPDH mRNA**

| <b>Rat number</b> | <b>L1-2<br/>(injection)</b> | <b>L3-6</b> |
|-------------------|-----------------------------|-------------|
| 7.1               | 0,0644                      | 0,0616      |
| 7.2               | 0,0700                      | 0,0803      |
| 7.3               | 0,0816                      | 0,0764      |
| 7.4               | 0,0732                      | 0,0806      |
| 7.5               | 0,0510                      | 0,0649      |
| 5.1               | 0,0500                      | 0,0726      |
| 5.2               | 0,0304                      | 0,0530      |
| 5.4               | 0,0284                      | 0,0560      |
| 4.8               | 0,0527                      | 0,1428      |
| 4.10              | 0,0898                      | 0,1426      |
| 4.11              | 0,0853                      | 0,1216      |

|                |
|----------------|
| Intact control |
| SP-PBS         |
| SP-BDNF        |

**KCC2/GAPDH mRNA**

| <b>Rat number</b> | L1-2<br>(injection) | L3-6   |
|-------------------|---------------------|--------|
| 7.1               | 0,0943              | 0,0767 |
| 7.2               | 0,0833              | 0,0892 |
| 7.3               | 0,0843              | 0,0967 |
| 7.4               | 0,0817              | 0,1016 |
| 7.5               | 0,0743              | 0,0836 |
| 5.1               | 0,0535              | 0,0982 |
| 5.2               | 0,0447              | 0,0627 |
| 5.4               | 0,0376              | 0,0669 |
| 4.6               | 0,0496              | 0,0671 |
| 4.8               | 0,0381              | 0,0587 |
| 4.10              | 0,0370              | 0,0669 |
| 4.11              | 0,0471              | 0,0586 |

- Intact control
- SP-PBS
- SP-BDNF

**VGluT1/GAPDH mRNA**

| <b>Rat number</b> | L1-2<br>(injection) | L3-6    |
|-------------------|---------------------|---------|
| 7.1               | 0,01491             | 0,00088 |
| 7.2               | 0,01271             | 0,00073 |
| 7.3               | 0,01599             | 0,00081 |
| 7.4               | 0,01290             | 0,00304 |
| 7.5               | 0,01023             | 0,00108 |
| 5.1               | 0,00066             | 0,00024 |
| 5.2               | 0,00036             | 0,00047 |
| 5.4               | 0,00082             | 0,00100 |
| 4.6               | 0,00087             | 0,00046 |
| 4.8               | 0,00030             | 0,00088 |
| 4.10              | 0,00113             | 0,00060 |
| 4.11              | 0,00213             | 0,00040 |

|                |
|----------------|
| Intact control |
| SP-PBS         |
| SP-BDNF        |



**VGlut2/GAPDH mRNA**

| <b>Rat number</b> | Th 11-12<br>(lesion) | L1-2<br>(injection) | L3-6   |
|-------------------|----------------------|---------------------|--------|
| 7.1               | 0,0793               | 0,1310              | 0,0704 |
| 7.2               | 0,0842               | 0,1162              | 0,0817 |
| 7.3               | 0,0826               | 0,1247              | 0,0865 |
| 7.4               | 0,0751               | 0,1172              | 0,1016 |
| 7.5               | 0,0949               | 0,0976              | 0,1100 |
| 5.1               | 0,0006               | 0,0563              | 0,0697 |
| 5.2               | 0,0048               | 0,0364              | 0,0516 |
| 5.4               | 0,0007               | 0,0343              | 0,0547 |
| 4.6               | 0,0210               | 0,0887              | 0,1427 |
| 4.8               | 0,0281               | 0,0560              | 0,1359 |
| 4.10              | 0,0320               | 0,0888              | 0,1081 |
| 4.11              | 0,0172               | 0,1052              | 0,0999 |

Intact control

SP-PBS

SP-BDNF

**KCC2 protein**

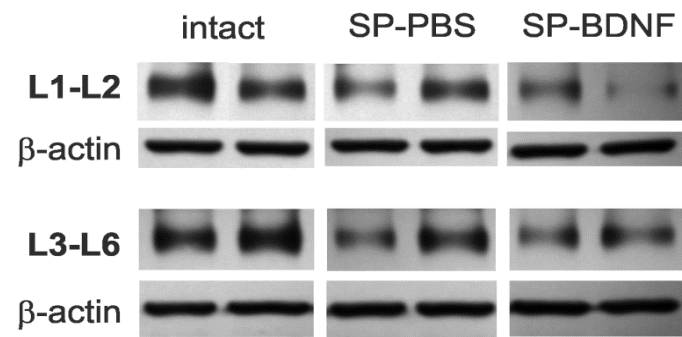

Supplement: pone.0088833.s004.pdf [file pone.0088833.s004.pdf]
